# Supplementary material
Source: PubMed Central journal article supplement (PMC3604724)
Supplement: emboj201333s1.pdf [file emboj201333s1.pdf]

## SUPPLEMENTARY DATA

**Figure 1 Phenotyping of *LFA-1<sup>+/+</sup>* and *LFA-1<sup>-/-</sup>* CD4 T cell populations before and after adoptive transfer into WT host mice. (A)** FACS analysis of the initial populations of *LFA-1<sup>+/+</sup>* and *LFA-1<sup>-/-</sup>* CD4 T cells highlighting comparable proportions of the major subset of naïve cells (CD62L<sup>+</sup>, CD44<sup>lo</sup>); typical data for n=6 mice/group. **(B)** Adoptively transferred *LFA-1<sup>+/+</sup>* and *LFA-1<sup>-/-</sup>* CD4 (CD62L<sup>+</sup>, CD44<sup>lo</sup>) T cells ( $5 \times 10^6$  per cell type) in LN of WT host mice at 6 h; the CD44 versus CD62L analysis was gated on CFSE<sup>+</sup> (*LFA-1<sup>+/+</sup>*) and SNARF-1<sup>+</sup> (*LFA-1<sup>-/-</sup>*) cells; experiment contemporaneous with (A); typical data for n=6 mice/group. **(C)** Blocking effect on T cell entry into LN following treatment with L-selectin/ $\alpha$ 4 mAbs. To ensure that further entry of both *LFA-1<sup>+/+</sup>* and *LFA-1<sup>-/-</sup>* T cells were equally blocked, L-selectin mAb MEL-14 and  $\alpha$ 4 integrin mAb PS2/3 or PBS as a control were injected 30 min prior to the fluorochrome-labelled T cells ( $5 \times 10^6$  per cell type), then T cell numbers were assessed 4 h later. Following this treatment, *LFA-1<sup>+/+</sup>* and *LFA-1<sup>-/-</sup>* T cell entry were both blocked by >99% (see text). To ensure the efficiency of the mAb blocking regime, the protocol was carried out contemporaneously with the LN trafficking experiments.

## **Figure 2. Phenotypic details of lymphatic vessels in the inguinal LN.**

**(A)** Tiled image of pLN showing distribution of LYVE-1-expressing LV. Additionally illustrated are subcapsular sinus, T zone and medulla for orientation; inset area showing fine detail of the LV sinuses extending from the (para-)cortical T zone (upper left corner of inset) to the subcapsular sinus (lower right corner of inset). Alexa 546- or Pacific Blue-conjugated LYVE-1

mAb was injected into the flank of a mouse near the inguinal LN and labeling of LV observed after 16-24 hr. **(B)** Tiled image of pLN showing distribution of s.c applied FITC-dextran (2 MDa)(green) to illustrate overlap with LYVE-1<sup>+</sup> LV (blue); inset areas show detail of the cortical (inset 1) and medullary (inset 2) sinuses. Flow of lymphatic fluid is confirmed by the spread of 2 MDa FITC-dextran (green) throughout the network with pattern generally overlapping Pacific blue-conjugated LYVE-1 labeling (blue). The FITC-dextran was concentrated in the subcapsular sinus region, but extended into the lymphatic vessels in the cortical region (**inset 1**) and into the medulla (**inset 2**).

**Figure 3. Transwell assay showing migration of primary LFA-1<sup>+/+</sup> and LFA-1<sup>-/-</sup> CD4 T cells on ICAM-1-coated filters.** The fold induction of T cell migration over 1.5 h in response to 25 nM S1P and 6 μM CCL21 in the lower chamber is shown; filters were coated with mouse ICAM-1Fc at 1 μg/ml overnight and T cells were pre-incubated in fatty acid free BSA for 4 h prior to the experiment; data averaged from n=4 experiments.

**Figure 4. Intranodal T cell motility and peripheral lymphopenia upon administration of FTY720.** **(A)** Intravital microscopy of T cell velocity in the inguinal lymph node of the mouse (paracortical T zone, 150 μm depth) at 8 hr after administration of FTY720 or PBS; mice were treated with FTY720 (Cayman Chemical Company, Ann Arbor, MI, USA) i.p. at 1 mg/kg, following a regime previously shown to be effective for at least 20 hr (Cinamon *et al* Nat. Immunol. 5, 713-20 2004; Brown *et al*, J. Immunol. 185, 4873-82, 2010); **(B)** Blood cells counts for PBL, B cells, and CD4<sup>+</sup> T cells as measured by flow

cytometry. In untreated animals, this resulted in ~20,000 total peripheral blood leucocytes (PBL) events per sample. Data are from two independent experiments with a total of 4 and 5 mice each for intravital analysis of T cell motility and FACS analysis of blood cell counts respectively. For intravital analysis of T cell motility, 100 T cells per experiment were counted.

**Figure 5. *LFA-1<sup>+/+</sup>* and *LFA-1<sup>-/-</sup>* T cell associations with tubular LVs in the peripheral medullary region of the T zone.**

(A) Intra-vital microscope image of *LFA-1<sup>-/-</sup>* and *LFA-1<sup>+/+</sup>* CD4 cells associated with LYVE-1+ tubular LV area at 50-80  $\mu\text{m}$  depth, intermediate between paracortical T zone and medulla; macrophages (auto-fluorescent, white) are associated with the LV in this region; scale bar=50  $\mu\text{m}$ . (B) Quantification data for T cell velocity in areas with x-y axes of 250  $\mu\text{m}$ ; data combined from 3 experiments with >50 cells analysed per T cell type.

**Figure 6. Expression of the LFA-1 ligand ICAM-1 on LYVE-1-positive lymphatic vessels and MOMA-1/CD169-positive macrophages in the medulla area.** Sections of inguinal lymph node (see Fig. 8a) were stained for ICAM-1 (red), LYVE-1 (green) and MOMA-1/CD169 (blue) and co-expression (merge) was viewed by confocal microscopy (63x, LSM 710); scale bar=30  $\mu\text{m}$ .

**Figure 7. Lack of effect of swapping the fluorescent dyes used for intravital staining of T cells (to accompany Fig. 6).** There were no effects of colour swap on (A) velocity of *LFA-1<sup>-/-</sup>* and *LFA-1<sup>+/+</sup>* T cells or (B) their

observed morphological differences when viewed by intravital microscopy. The T cells displayed equivalent differences when labelled with SNARF (red) or CFSE (green) when migrating in the branched LV network of the medulla.

**Video 1. Demonstration of T cell velocity in different zones of the LN.**

The movie shows the high motility of T cells within the T zone (left) and slow to arrested motion of the cells at the rim of the T zone in the highly branched LV network of the medulla region (right). *LFA*<sup>+/+</sup> T cells (green, quenched in the blue zone); *LFA-1*<sup>-/-</sup> T cells (red); LYVE-1<sup>+</sup> LV (blue); auto-fluorescent macrophages (white); section width is 300 µm; projection view of a 7 x 5 µm z-stack; images taken every 30 sec; duration: 20 min.

**Video 2. Flow in an efferent lymphatic vessel leading from an inguinal lymph node.**

Monitoring of flow in an efferent vessel of inguinal lymph node following injection of FITC-Dextran (2 MDa, green) s.c. into the footpad at 2.5 h before imaging. Blue: Vessel walls (SHF, second harmonic generation signal of collagen fibers); interval between frames, 16 sec, duration: 2 h.

**Video 3. Motility of T cells contacting a tubular LYVE-1+ LV adjacent to the paracortical T zone.**

*LFA-1*<sup>+/+</sup> T cells (green), *LFA*<sup>-/-</sup> T cells (red) are crossing into and out of the LYVE-1<sup>+</sup> LV (blue); detail of two LV in cross section outlined in white showing 4 *LFA-1*<sup>-/-</sup> T cells (circled, red) making contact and entering the vessels and 3 *LFA-1*<sup>+/+</sup> T cells (circled, green) behaving similarly, but leaving the vessel area following LV probing; section

width is 200  $\mu\text{m}$ ; projection view of a 7 x 5  $\mu\text{m}$  z-stack; images taken every 30 sec; duration: 30 min.

**Video 4. Detail of the behaviour of *LFA-1*<sup>+/+</sup> and *LFA-1*<sup>-/-</sup> T cells migrating on LYVE-1 lymphatic vessel network in the region of the medulla. *LFA-1*<sup>+/+</sup> T cells (green) arrest more frequently and remain visible, while *LFA-1*<sup>-/-</sup> T cells (red) show straighter paths of movement and disappear into the LYVE-1+ lymphatic meshwork (blue) over time. The section width is 300  $\mu\text{m}$ ; images taken every 4 sec; duration: 9.3 min.**

# Supplementary Figure 1

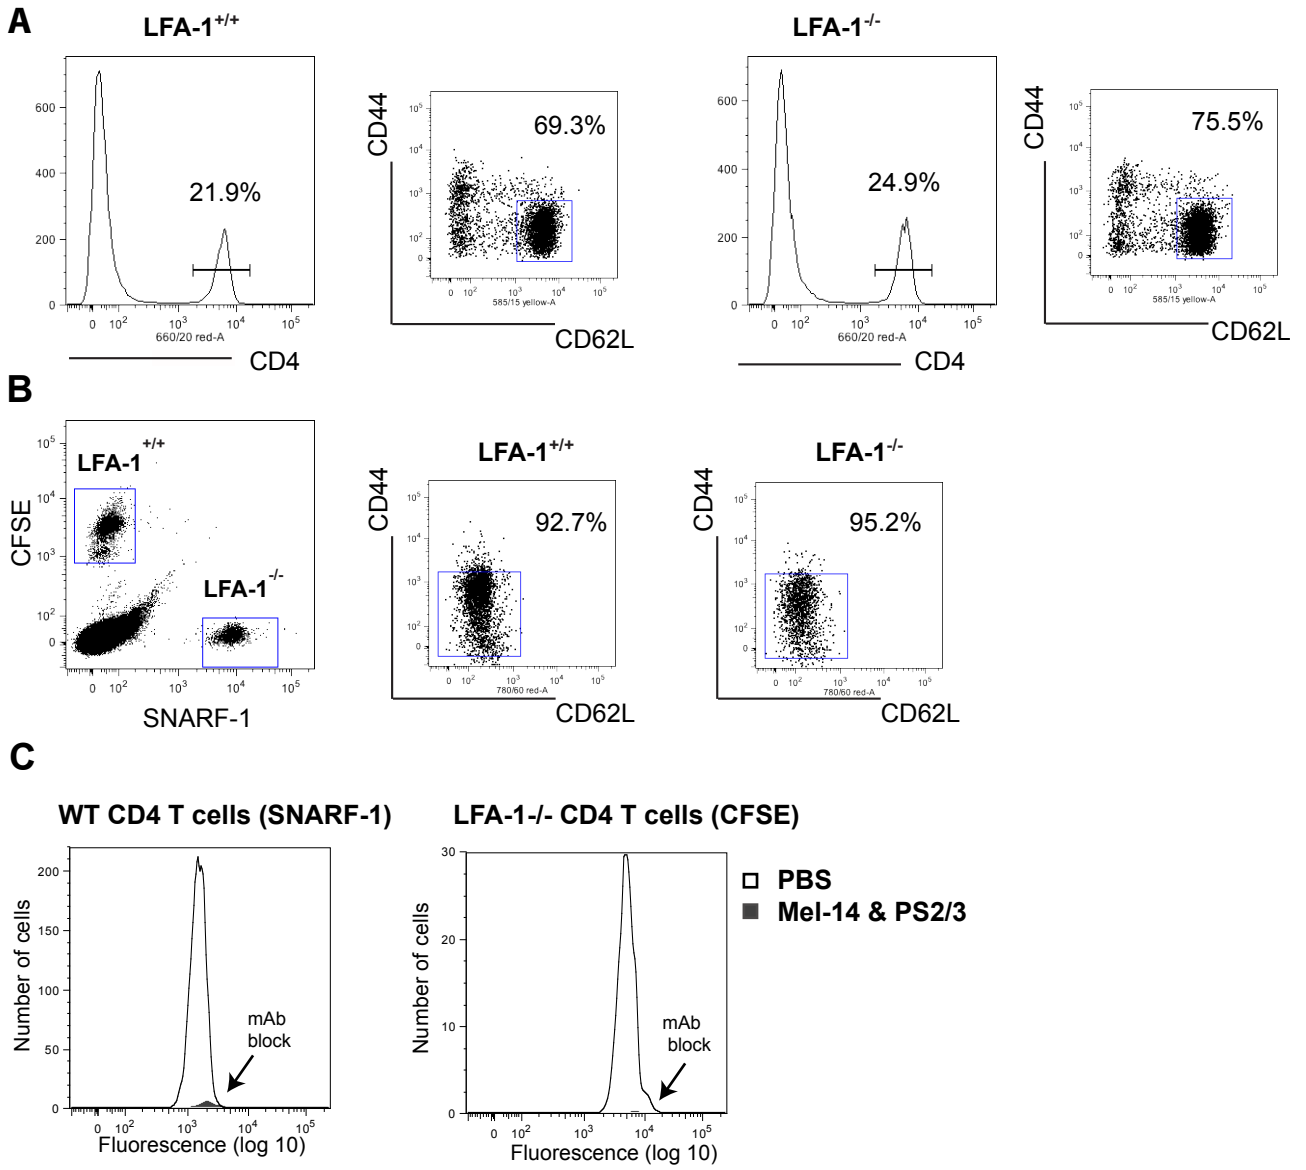

# Supplementary Figure 2

A

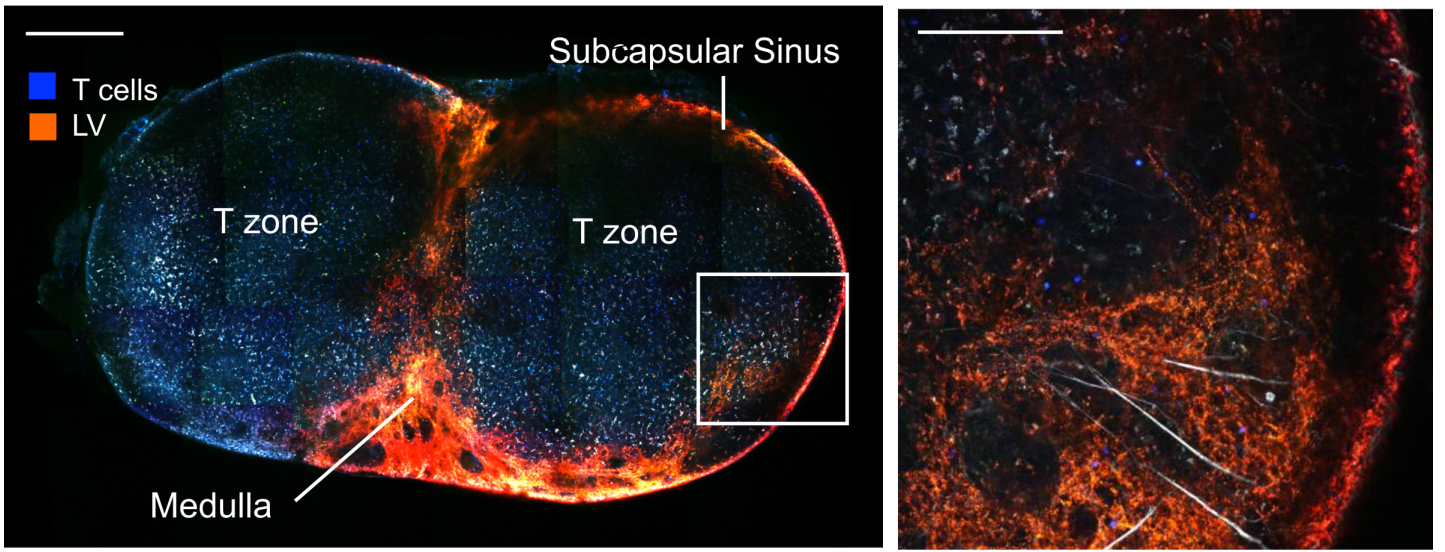

B

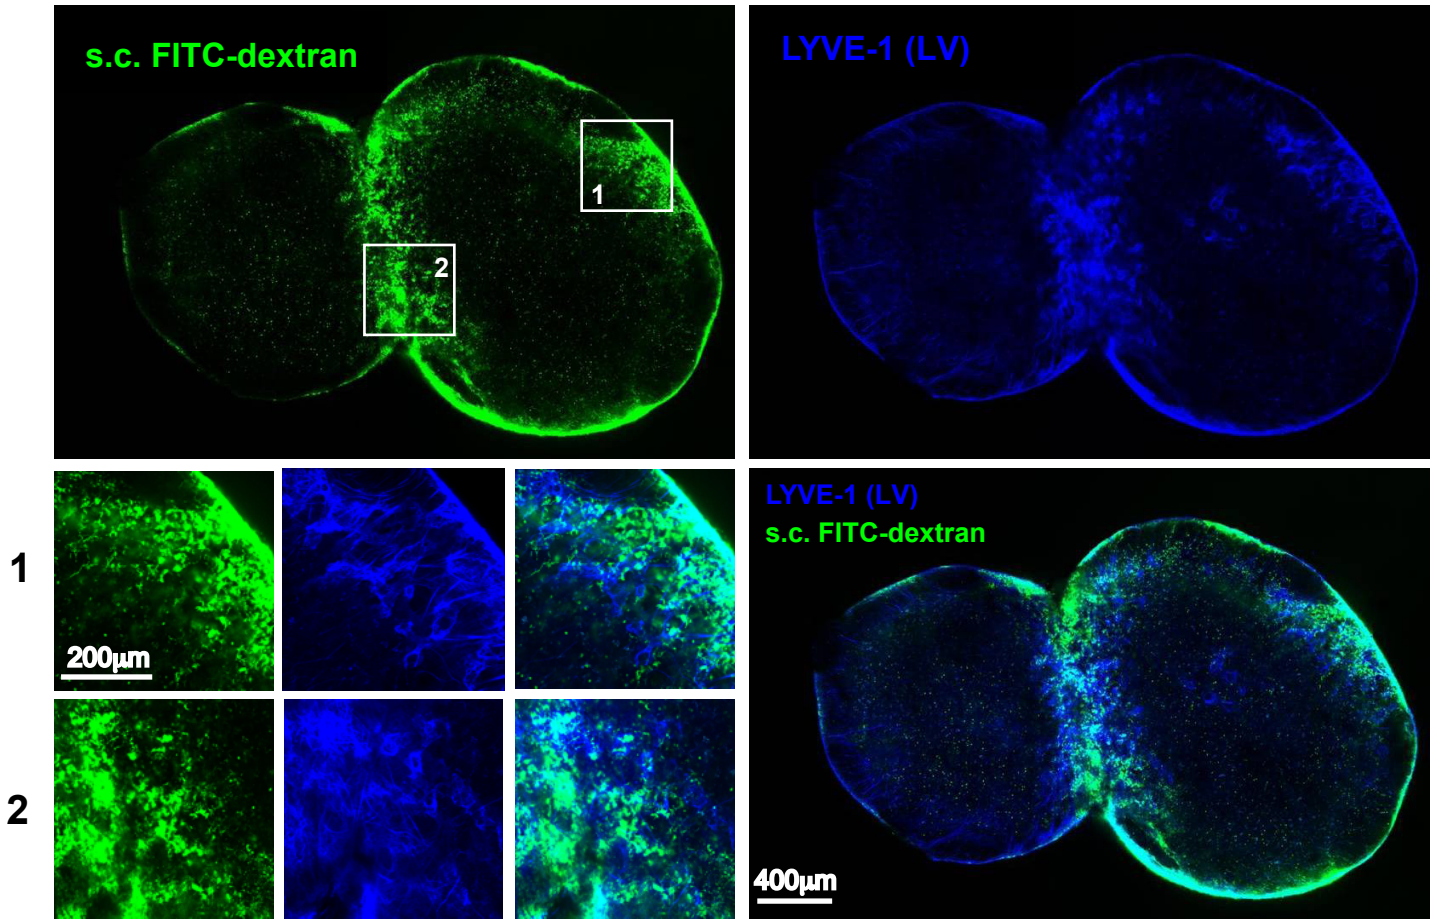

### Supplementary Figure 3

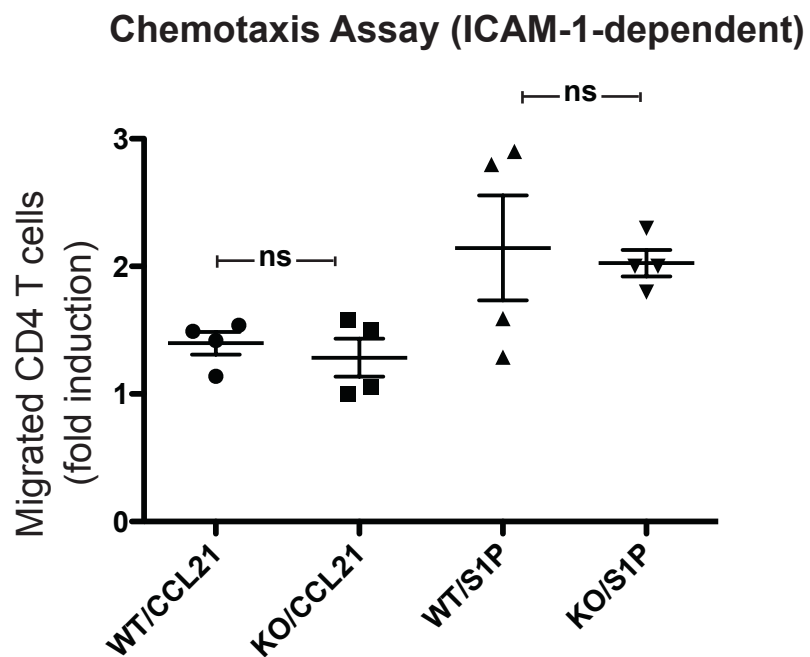



# Supplementary Figure 4

## A

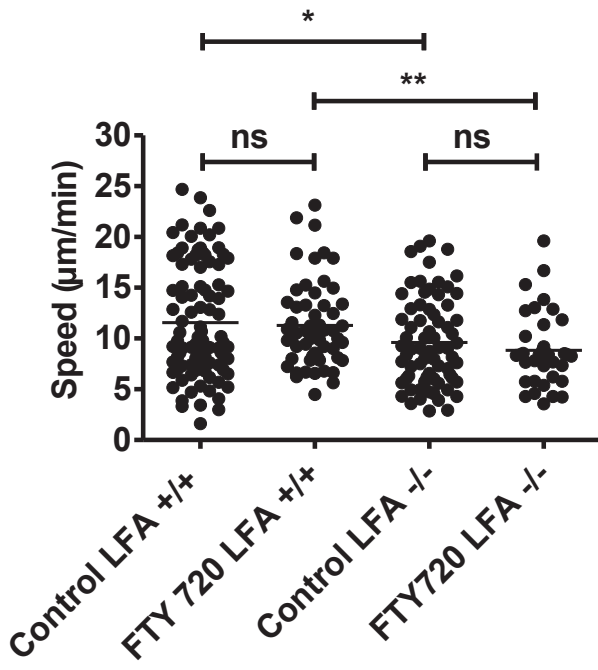

## B

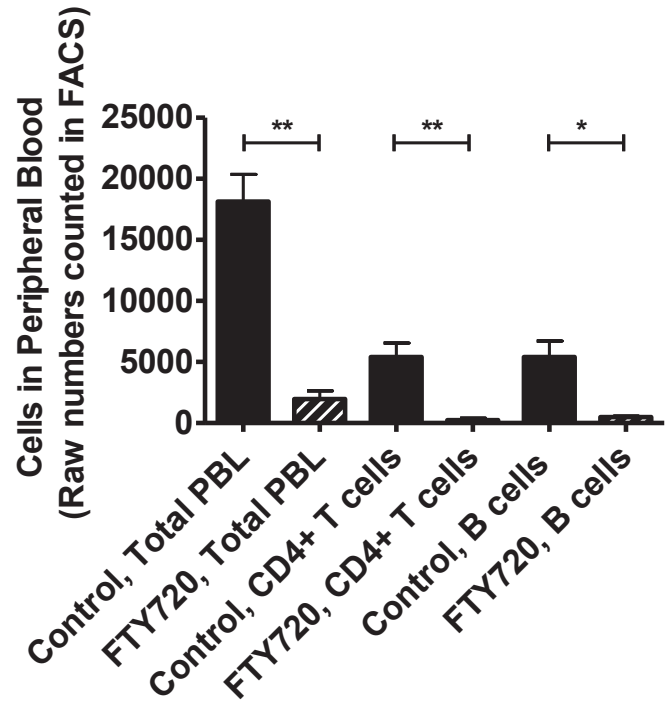

# Supplementary Figure 5

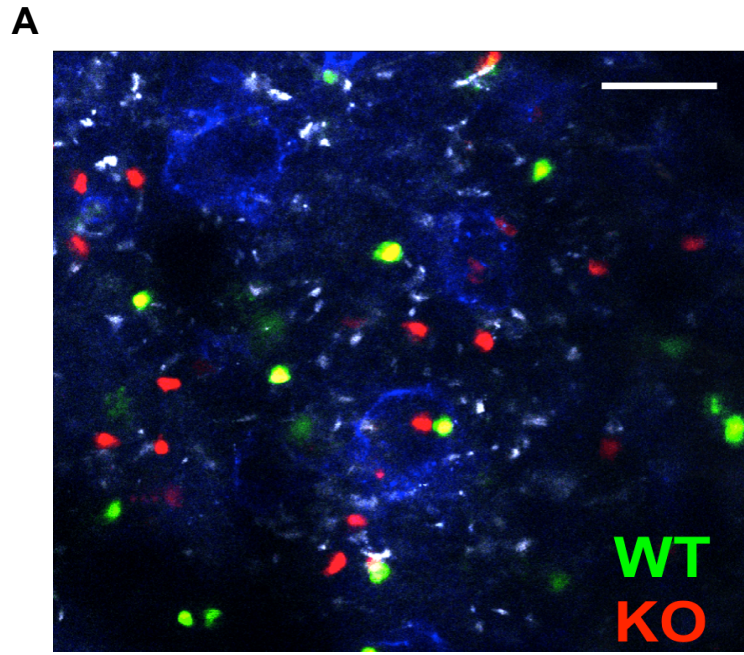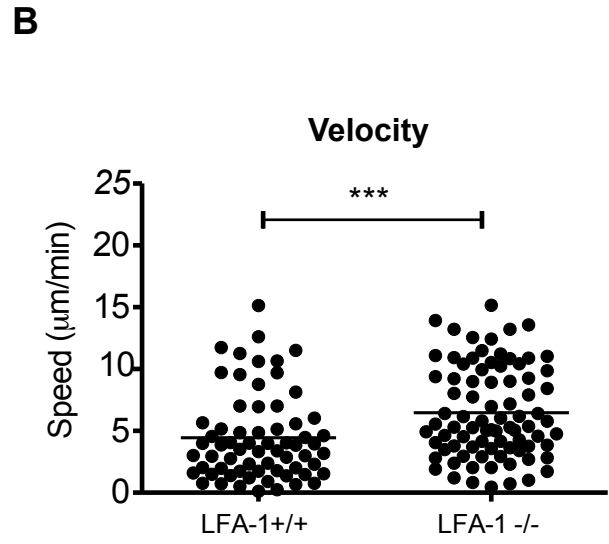

Supplementary Figure 6

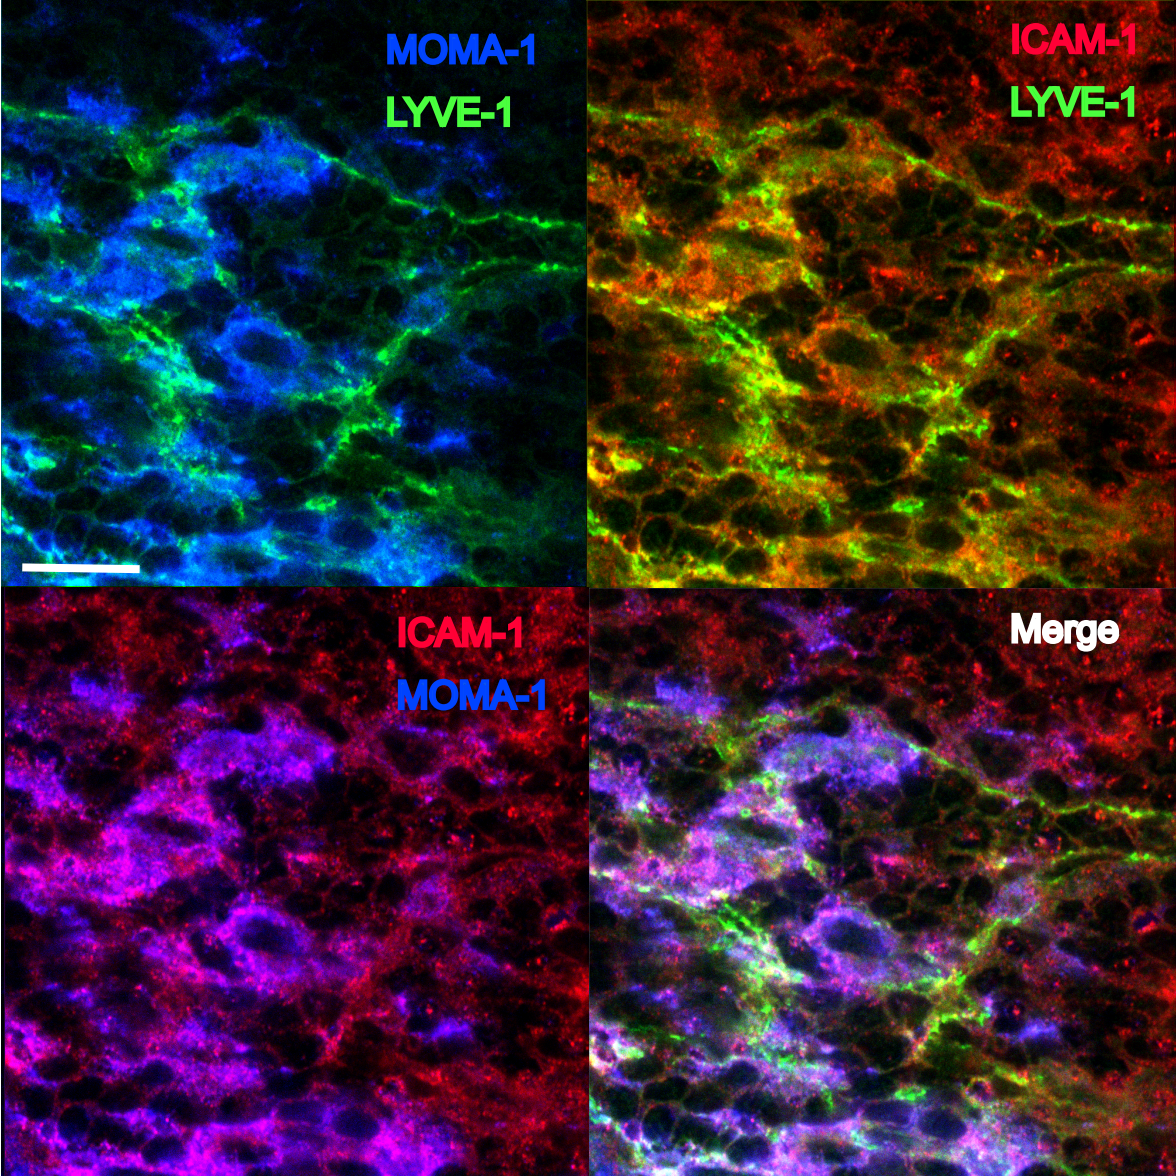

# Supplementary Figure 7

## A Velocity at distal LV (Fig. 6C)

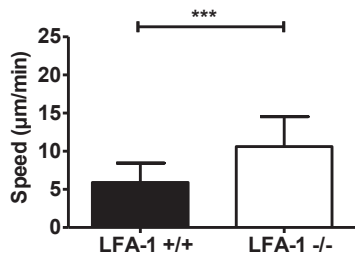

LFA-1+/+ cells stained CFSE (green)

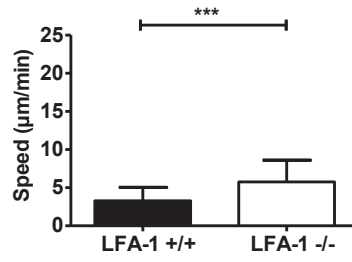

LFA-1+/+ cells stained SNARF (red)

## B Axis ratio (Fig. 6D)

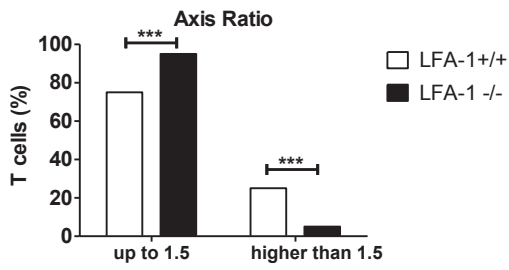

LFA-1+/+ cells stained CFSE (green)

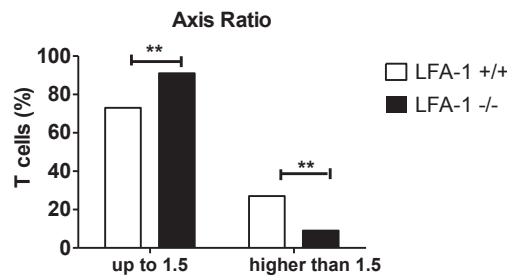

LFA-1+/+ cells stained SNARF (red)
